# Supplementary material
Source: HighWire-hosted journal article supplement (https://erj.ersjournals.com/content/59/6/2103023)
Supplement: inline-supplementary-material-1 [file inline-supplementary-material-1.pdf]

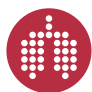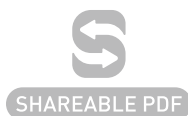

# Oscillatory mechanics at 36 weeks post-menstrual age as markers of lung disease in preterm infants: a cohort study

Emanuela Zannin <sup>1,2</sup>, Camilla Rigotti<sup>1</sup>, Roland P. Neumann <sup>3</sup>, Raffaele L. Dellacà <sup>2</sup>,  
Sven Schulzke<sup>3</sup> and Maria Luisa Ventura<sup>1</sup>

<sup>1</sup>UO Neonatologia e Terapia Intensiva Neonatale, Fondazione Monza e Brianza per il Bambino e la sua Mamma (MBBM), Monza, Italy. <sup>2</sup>TechRes Lab, Dipartimento di Elettronica, Informazione e Bioingegneria, Politecnico di Milano University, Milan, Italy. <sup>3</sup>Dept of Neonatology, University Children's Hospital Basel UKBB, University of Basel, Basel, Switzerland.

Corresponding author: Emanuela Zannin (ezannin@fondazionembbm.it)

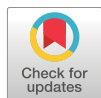

Shareable abstract (@ERSpublications)

**Respiratory system resistance and reactance assessed at 36 weeks post-menstrual age by the forced oscillation technique are sensitive functional markers of the severity of lung disease in former preterm infants** <https://bit.ly/3rZBq6z>

**Cite this article as:** Zannin E, Rigotti C, Neumann RP, *et al.* Oscillatory mechanics at 36 weeks post-menstrual age as markers of lung disease in preterm infants: a cohort study. *Eur Respir J* 2022; 59: 2103023 [DOI: 10.1183/13993003.03023-2021].

This single-page version can be shared freely online.

Copyright ©The authors 2022. For reproduction rights and permissions contact [permissions@ersnet.org](mailto:permissions@ersnet.org)

Received: 2 Dec 2021  
Accepted: 9 Feb 2022

*To the Editor:*

Bronchopulmonary dysplasia (BPD) is the most frequent morbidity of preterm birth and is characterised by abnormal or arrested pulmonary development. Current definitions of BPD suffer from the limitation that they are based on treatment at specific time points [1, 2]. Lung mechanics may provide continuous markers of lung disease, independent from unit policies, which could be repeated over time during the evolving phase or follow-up.
